# Supplementary material
Source: PubMed Central journal article supplement (PMC8507044)
Supplement: ajtr0013-10315-f6.pdf [file ajtr0013-10315-f6.pdf]

## Mechanism of fraxetin in myocardial infarction

**Supplementary Table 1.** Body weight for each group at the day 1 and day 17 (three days after MI)

| Group               | Day 1 (g)    | Day 17 (g)   |
|---------------------|--------------|--------------|
| Sham                | 221.52±10.15 | 225.45±8.43  |
| Fra                 | 219.87±12.52 | 226.98±11.27 |
| MI                  | 223.27±10.55 | 222.53±15.19 |
| Fra (5 mg/kg) + MI  | 217.80±9.26  | 223.65±12.57 |
| Fra (25 mg/kg) + MI | 223.41±12.11 | 226.51±14.52 |
| F                   | 0.281        | 0.135        |
| P                   | 0.888        | 0.968        |

Note: Values are presented as mean ± SD. MI, myocardial infarction; Fra, fraxetin.

**Supplementary Table 2.** Organ index for each group at the day 17 (three days after MI)

| Group               | Heart (g/kg) | Liver (g/kg) | Kindy (g/kg) | Lungs (g/kg) | Spleen (g/kg) |
|---------------------|--------------|--------------|--------------|--------------|---------------|
| Sham                | 2.81±0.29    | 33.31±2.12   | 3.61±0.32    | 4.81±0.45    | 2.54±0.31     |
| Fra                 | 2.73±0.34    | 33.62±1.83   | 3.75±0.43    | 4.98±0.52    | 2.67±0.42     |
| MI                  | 2.93±0.17    | 35.18±3.20   | 3.82±0.25    | 5.34±0.62    | 2.35±0.45     |
| Fra (5 mg/kg) + MI  | 2.98±0.25    | 34.72±3.14   | 3.73±0.25    | 5.16±0.42    | 2.52±0.35     |
| Fra (25 mg/kg) + MI | 2.86±0.26    | 34.15±3.64   | 3.79±0.43    | 4.98±0.82    | 2.63±0.32     |
| F                   | 0.809        | 0.430        | 0.327        | 0.719        | 0.689         |
| P                   | 0.531        | 0.786        | 0.858        | 0.587        | 0.626         |

Note: Values are presented as mean ± SD. MI, myocardial infarction; Fra, fraxetin.

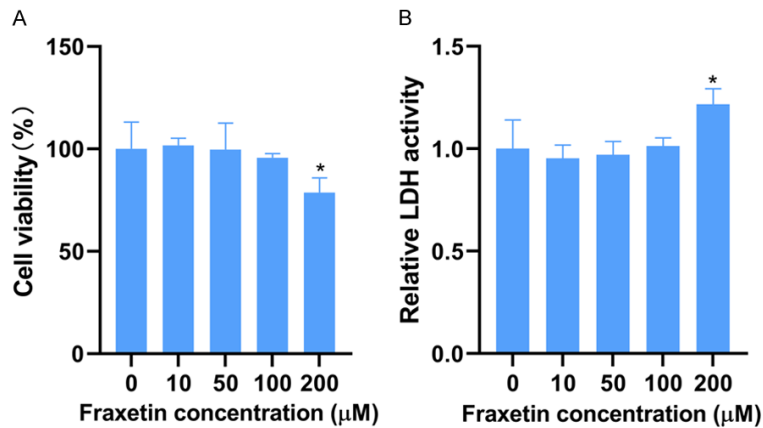

**Supplementary Figure 1.** The toxic effect of Fra on H9C2 cells. H9C2 cells were incubated in DEME medium containing increasing doses (0, 10, 50, 100 and 200 μM) of Fra for 24 h. A. MTT assay was conducted to assess the cell viability. B. The activity of LDH was examined using LDH detection kit. \* $P < 0.05$  vs. 0 μM group.

## Mechanism of fraxetin in myocardial infarction

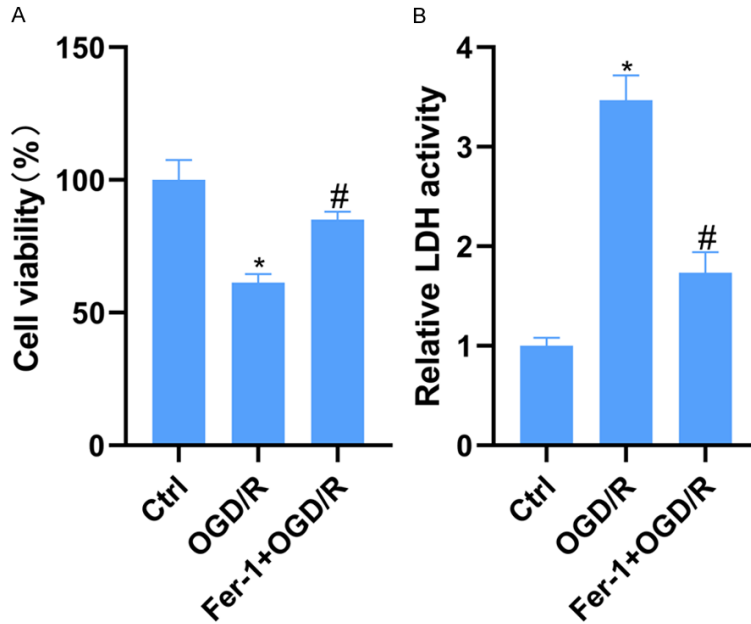

**Supplementary Figure 2.** Fer-1 increases the viability of H9C2 cells following OGD/R. H9C2 cells were treated with 10  $\mu$ M Fer-1 and then subjected to OGD/R. A. MTT assay was conducted to assess the cell viability. B. The activity of LDH was examined using an LDH detection kit. \* $P < 0.05$  vs. ctrl group; # $P < 0.05$  vs. OGD/R group.

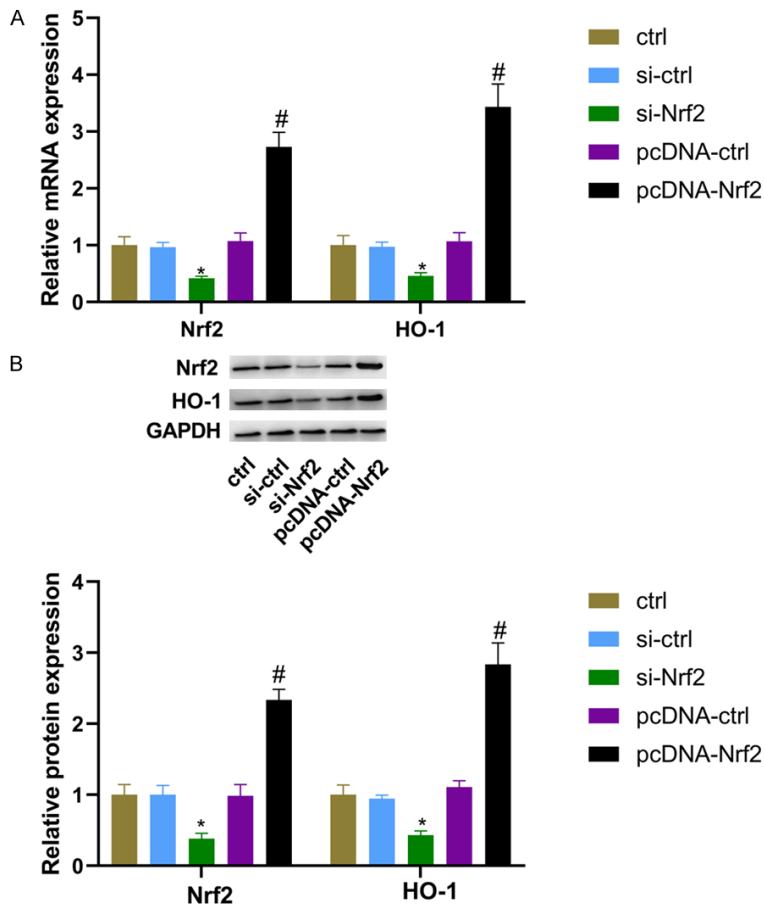

**Supplementary Figure 3.** Nrf2 positively regulates the expression of HO-1. A. qRT-PCR analysis of Nrf2 and HO-1 mRNA expression in H9C2 cells transfected with si-Nrf2, pcDNA-Nrf2 or match controls. B. WB analysis of Nrf2 and HO-1 protein expression in H9C2 cells transfected with si-Nrf2, pcDNA-Nrf2 or match controls. \* $P < 0.05$  vs. si-ctrl group; # $P < 0.05$  vs. pcDNA-ctrl group.
